# Supplementary material for: Evaluation of the osteoprotective potential of whey derived-antioxidative (YVEEL) and angiotensin-converting enzyme inhibitory (YLLF) bioactive peptides in ovariectomised rats
Source: Royal Society of Chemistry journal article supplement (doi:10.1039/c8fo00620b), 2018-01-01
Supplement: c8fo00620b1.pdf [file c8fo00620b1.pdf]

## Supporting information

### Evaluation of the osteoprotective potential of whey derived-antioxidative (YVEEL) and angiotensin-converting enzyme inhibitory (YLLF) bioactive peptides in ovariectomised rats

#### Statistical significance values:

**Fig 1b**

| Tukey's Multiple Comparison Test | Mean Diff. | q     | Significant? P < 0.05? | Summary | 95% CI of diff       |
|----------------------------------|------------|-------|------------------------|---------|----------------------|
| Sham vs Ovx                      | 0.2400     | 27.73 | Yes                    | **      | 0.2025 to 0.2775     |
| Sham vs AO                       | 0.1416     | 16.36 | Yes                    | **      | 0.1041 to 0.1791     |
| Sham vs ACE I                    | 0.1872     | 21.63 | Yes                    | **      | 0.1497 to 0.2247     |
| Sham vs PTH                      | 0.05200    | 6.008 | Yes                    | **      | 0.01450 to 0.08950   |
| Ovx vs AO                        | -0.09840   | 11.37 | Yes                    | **      | -0.1359 to -0.06090  |
| Ovx vs ACE I                     | -0.0528    | 6.100 | Yes                    | **      | -0.09030 to -0.01530 |
| Ovx vs PTH                       | -0.1880    | 21.72 | Yes                    | **      | -0.2255 to -0.1505   |
| AO vs ACE I                      | 0.04560    | 5.268 | Yes                    | *       | 0.008097 to 0.08310  |
| AO vs PTH                        | -0.0896    | 10.35 | Yes                    | **      | -0.1271 to -0.05210  |
| ACE I vs PTH                     | -0.1352    | 15.62 | Yes                    | **      | -0.1727 to -0.09770  |

**Fig 2-II(a)**

| Tukey's Multiple Comparison Test | Mean Diff. | q     | Significant? P < 0.05? | Summary | 95% CI of diff       |
|----------------------------------|------------|-------|------------------------|---------|----------------------|
| Sham vs OVX                      | 0.2183     | 40.47 | Yes                    | **      | 0.1959 to 0.2408     |
| Sham vs AO                       | 0.1333     | 24.71 | Yes                    | **      | 0.1109 to 0.1558     |
| Sham vs ACE I                    | 0.1783     | 33.05 | Yes                    | **      | 0.1559 to 0.2008     |
| Sham vs PTH                      | 0.0600     | 11.12 | Yes                    | **      | 0.03758 to 0.08242   |
| OVX vs AO                        | -0.08500   | 15.75 | Yes                    | **      | -0.1074 to -0.06258  |
| OVX vs ACE I                     | -0.04000   | 7.414 | Yes                    | **      | -0.06242 to -0.01758 |
| OVX vs PTH                       | -0.1583    | 29.35 | Yes                    | **      | -0.1808 to -0.1359   |
| AO vs ACE I                      | 0.04500    | 8.340 | Yes                    | **      | 0.02258 to 0.06742   |
| AO vs PTH                        | -0.07333   | 13.59 | Yes                    | **      | -0.09575 to -0.05091 |
| ACE I vs PTH                     | -0.1183    | 21.93 | Yes                    | **      | -0.1408 to -0.09591  |

**Fig 2-II(b)**

| Tukey's Multiple Comparison Test | Mean Diff. | q     | Significant? P < 0.05? | Summary | 95% CI of diff   |
|----------------------------------|------------|-------|------------------------|---------|------------------|
| Sham vs OVX                      | 23.28      | 23.55 | Yes                    | **      | 19.17 to 27.38   |
| Sham vs AO                       | 12.85      | 13.00 | Yes                    | **      | 8.743 to 16.96   |
| Sham vs ACE I                    | 17.67      | 17.88 | Yes                    | **      | 13.56 to 21.78   |
| Sham vs PTH                      | 11.36      | 11.50 | Yes                    | **      | 7.258 to 15.47   |
| OVX vs AO                        | -10.43     | 10.55 | Yes                    | **      | -14.53 to -6.320 |
| OVX vs ACE I                     | -5.606     | 5.673 | Yes                    | **      | -9.713 to -1.499 |
| OVX vs PTH                       | -11.91     | 12.05 | Yes                    | **      | -16.02 to -7.805 |
| AO vs ACE I                      | 4.821      | 4.878 | Yes                    | *       | 0.7144 to 8.928  |
| AO vs PTH                        | -1.485     | 1.502 | No                     | ns      | -5.591 to 2.622  |
| ACE I vs PTH                     | -6.306     | 6.381 | Yes                    | **      | -10.41 to -2.199 |

**Fig 2-II(c)**

| Tukey's Multiple Comparison Test | Mean Diff. | q     | Significant? P < 0.05? | Summary | 95% CI of diff        |
|----------------------------------|------------|-------|------------------------|---------|-----------------------|
| Sham vs OVX                      | 0.03986    | 33.00 | Yes                    | **      | 0.03475 to 0.04498    |
| Sham vs AO                       | 0.02451    | 20.29 | Yes                    | **      | 0.01940 to 0.02963    |
| Sham vs ACE I                    | 0.03035    | 25.12 | Yes                    | **      | 0.02523 to 0.03546    |
| Sham vs PTH                      | 0.01068    | 8.840 | Yes                    | **      | 0.005567 to 0.01579   |
| OVX vs AO                        | -0.01535   | 12.71 | Yes                    | **      | -0.02046 to -0.01024  |
| OVX vs ACE I                     | -0.009517  | 7.877 | Yes                    | **      | -0.01463 to -0.004404 |
| OVX vs PTH                       | -0.02918   | 24.16 | Yes                    | **      | -0.03430 to -0.02407  |
| AO vs ACE I                      | 0.005833   | 4.828 | Yes                    | *       | 0.0007204 to 0.01095  |
| AO vs PTH                        | -0.01383   | 11.45 | Yes                    | **      | -0.01895 to -0.008720 |
| ACE I vs PTH                     | -0.01967   | 16.28 | Yes                    | **      | -0.02478 to -0.01455  |

**Fig 2-II(d)**

| Tukey's Multiple Comparison Test | Mean Diff. | q     | Significant? P < 0.05? | Summary | 95% CI of diff     |
|----------------------------------|------------|-------|------------------------|---------|--------------------|
| Sham vs OVX                      | 2.940      | 39.06 | Yes                    | **      | 2.622 to 3.259     |
| Sham vs AO                       | 1.735      | 23.05 | Yes                    | **      | 1.416 to 2.053     |
| Sham vs ACE I                    | 2.139      | 28.42 | Yes                    | **      | 1.821 to 2.458     |
| Sham vs PTH                      | 1.075      | 14.28 | Yes                    | **      | 0.7561 to 1.393    |
| OVX vs AO                        | -1.206     | 16.01 | Yes                    | **      | -1.524 to -0.8870  |
| OVX vs ACE I                     | -0.8010    | 10.64 | Yes                    | **      | -1.120 to -0.4824  |
| OVX vs PTH                       | -1.866     | 24.78 | Yes                    | **      | -2.184 to -1.547   |
| AO vs ACE I                      | 0.4045     | 5.374 | Yes                    | **      | 0.08596 to 0.7231  |
| AO vs PTH                        | -0.6602    | 8.770 | Yes                    | **      | -0.9788 to -0.3416 |
| ACE I vs PTH                     | -1.065     | 14.14 | Yes                    | **      | -1.383 to -0.7462  |

**Fig 2-II(e)**

| Tukey's Multiple Comparison Test | Mean Diff. | q     | Significant? P < 0.05? | Summary | 95% CI of diff   |
|----------------------------------|------------|-------|------------------------|---------|------------------|
| Sham vs OVX                      | 135.0      | 21.70 | Yes                    | **      | 108.7 to 161.4   |
| Sham vs AO                       | 39.23      | 6.303 | Yes                    | **      | 12.89 to 65.56   |
| Sham vs ACE I                    | 76.34      | 12.27 | Yes                    | **      | 50.01 to 102.7   |
| Sham vs PTH                      | 14.23      | 2.286 | No                     | ns      | -12.11 to 40.56  |
| OVX vs AO                        | -95.82     | 15.40 | Yes                    | **      | -122.2 to -69.49 |
| OVX vs ACE I                     | -58.71     | 9.434 | Yes                    | **      | -85.04 to -32.37 |
| OVX vs PTH                       | -120.8     | 19.42 | Yes                    | **      | -147.2 to -94.49 |
| AO vs ACE I                      | 37.12      | 5.965 | Yes                    | **      | 10.78 to 63.45   |
| AO vs PTH                        | -25.00     | 4.017 | No                     | ns      | -51.34 to 1.336  |
| ACE I vs PTH                     | -62.12     | 9.982 | Yes                    | **      | -88.45 to -35.78 |

**Fig 2-II(f)**

| Tukey's Multiple Comparison Test | Mean Diff. | q     | Significant? P < 0.05? | Summary | 95% CI of diff       |
|----------------------------------|------------|-------|------------------------|---------|----------------------|
| Sham vs OVX                      | -0.4390    | 36.99 | Yes                    | **      | -0.4892 to -0.3887   |
| Sham vs AO                       | -0.09495   | 8.001 | Yes                    | **      | -0.1452 to -0.04473  |
| Sham vs ACE I                    | -0.1533    | 12.91 | Yes                    | **      | -0.2035 to -0.1030   |
| Sham vs PTH                      | -0.02629   | 2.215 | No                     | ns      | -0.07651 to 0.02394  |
| OVX vs AO                        | 0.3440     | 28.99 | Yes                    | **      | 0.2938 to 0.3942     |
| OVX vs ACE I                     | 0.2857     | 24.08 | Yes                    | **      | 0.2355 to 0.3359     |
| OVX vs PTH                       | 0.4127     | 34.77 | Yes                    | **      | 0.3625 to 0.4629     |
| AO vs ACE I                      | -0.05830   | 4.912 | Yes                    | *       | -0.1085 to -0.008076 |

|              |         |       |     |    |                   |
|--------------|---------|-------|-----|----|-------------------|
| AO vs PTH    | 0.06867 | 5.786 | Yes | ** | 0.01844 to 0.1189 |
| ACE I vs PTH | 0.1270  | 10.70 | Yes | ** | 0.07674 to 0.1772 |

**Fig 3-II(a)**

| Tukey's Multiple Comparison Test | Mean Diff. | q     | Significant? P < 0.05? | Summary | 95% CI of diff       |
|----------------------------------|------------|-------|------------------------|---------|----------------------|
| Sham vs OVX                      | 0.1643     | 29.21 | Yes                    | **      | 0.1405 to 0.1881     |
| Sham vs AO                       | 0.07933    | 14.10 | Yes                    | **      | 0.05553 to 0.1031    |
| Sham vs ACE I                    | 0.1142     | 20.30 | Yes                    | **      | 0.09036 to 0.1380    |
| Sham vs PTH                      | 0.07000    | 12.44 | Yes                    | **      | 0.04619 to 0.09381   |
| OVX vs AO                        | -0.08500   | 15.11 | Yes                    | **      | -0.1088 to -0.06119  |
| OVX vs ACE I                     | -0.05017   | 8.918 | Yes                    | **      | -0.07397 to -0.02636 |
| OVX vs PTH                       | -0.09433   | 16.77 | Yes                    | **      | -0.1181 to -0.07053  |
| AO vs ACE I                      | 0.03483    | 6.192 | Yes                    | **      | 0.01103 to 0.05864   |
| AO vs PTH                        | -0.009333  | 1.659 | No                     | ns      | -0.03314 to 0.01447  |
| ACE I vs PTH                     | -0.04417   | 7.851 | Yes                    | **      | -0.06797 to -0.02036 |

**Fig 3-II(b)**

| Tukey's Multiple Comparison Test | Mean Diff. | q     | Significant? P < 0.05? | Summary | 95% CI of diff   |
|----------------------------------|------------|-------|------------------------|---------|------------------|
| Sham vs OVX                      | 15.55      | 34.73 | Yes                    | **      | 13.65 to 17.44   |
| Sham vs AO                       | 4.032      | 9.007 | Yes                    | **      | 2.138 to 5.927   |
| Sham vs ACE I                    | 8.871      | 19.82 | Yes                    | **      | 6.976 to 10.77   |
| Sham vs PTH                      | 3.246      | 7.250 | Yes                    | **      | 1.351 to 5.140   |
| OVX vs AO                        | -11.51     | 25.72 | Yes                    | **      | -13.41 to -9.619 |
| OVX vs ACE I                     | -6.675     | 14.91 | Yes                    | **      | -8.570 to -4.780 |
| OVX vs PTH                       | -12.30     | 27.48 | Yes                    | **      | -14.19 to -10.41 |
| AO vs ACE I                      | 4.838      | 10.81 | Yes                    | **      | 2.944 to 6.733   |
| AO vs PTH                        | -0.7865    | 1.757 | No                     | ns      | -2.681 to 1.108  |
| ACE I vs PTH                     | -5.625     | 12.56 | Yes                    | **      | -7.520 to -3.730 |

**Fig 3-II(c)**

| Tukey's Multiple Comparison Test | Mean Diff. | q     | Significant? P < 0.05? | Summary | 95% CI of diff        |
|----------------------------------|------------|-------|------------------------|---------|-----------------------|
| Sham vs OVX                      | 0.04586    | 42.94 | Yes                    | **      | 0.04134 to 0.05038    |
| Sham vs AO                       | 0.02156    | 20.19 | Yes                    | **      | 0.01704 to 0.02608    |
| Sham vs ACE I                    | 0.03053    | 28.59 | Yes                    | **      | 0.02601 to 0.03504    |
| Sham vs PTH                      | 0.007859   | 7.360 | Yes                    | **      | 0.003340 to 0.01238   |
| OVX vs AO                        | -0.0243    | 22.76 | Yes                    | **      | -0.02882 to -0.01978  |
| OVX vs ACE I                     | -0.01533   | 14.36 | Yes                    | **      | -0.01985 to -0.01081  |
| OVX vs PTH                       | -0.0380    | 35.59 | Yes                    | **      | -0.04252 to -0.03348  |
| AO vs ACE I                      | 0.008967   | 8.397 | Yes                    | **      | 0.004447 to 0.01349   |
| AO vs PTH                        | -0.0137    | 12.83 | Yes                    | **      | -0.01822 to -0.009181 |
| ACE I vs PTH                     | -0.02267   | 21.23 | Yes                    | **      | -0.02719 to -0.01815  |

**Fig3-II (d)**

| Tukey's Multiple Comparison Test | Mean Diff. | q     | Significant? P < 0.05? | Summary | 95% CI of diff     |
|----------------------------------|------------|-------|------------------------|---------|--------------------|
| Sham vs OVX                      | 2.195      | 37.88 | Yes                    | **      | 1.950 to 2.441     |
| Sham vs AO                       | 0.9207     | 15.89 | Yes                    | **      | 0.6755 to 1.166    |
| Sham vs ACE I                    | 1.465      | 25.29 | Yes                    | **      | 1.220 to 1.711     |
| Sham vs PTH                      | 0.5596     | 9.656 | Yes                    | **      | 0.3143 to 0.8048   |
| OVX vs AO                        | -1.275     | 21.99 | Yes                    | **      | -1.520 to -1.029   |
| OVX vs ACE I                     | -0.7298    | 12.59 | Yes                    | **      | -0.9751 to -0.4845 |
| OVX vs PTH                       | -1.636     | 28.23 | Yes                    | **      | -1.881 to -1.390   |
| AO vs ACE I                      | 0.5448     | 9.400 | Yes                    | **      | 0.2995 to 0.7900   |
| AO vs PTH                        | -0.3612    | 6.232 | Yes                    | **      | -0.6064 to -0.1159 |
| ACE I vs PTH                     | -0.9059    | 15.63 | Yes                    | **      | -1.151 to -0.6607  |

**Fig3-II (e)**

| Tukey's Multiple Comparison Test | Mean Diff. | q | Significant? P < 0.05? | Summary | 95% CI of diff |
|----------------------------------|------------|---|------------------------|---------|----------------|
|----------------------------------|------------|---|------------------------|---------|----------------|

|               |        |       |     |    |                  |
|---------------|--------|-------|-----|----|------------------|
| Sham vs OVX   | 102.5  | 66.77 | Yes | ** | 96.02 to 109.0   |
| Sham vs AO    | 45.82  | 29.84 | Yes | ** | 39.32 to 52.32   |
| Sham vs ACE I | 57.23  | 37.27 | Yes | ** | 50.73 to 63.73   |
| Sham vs PTH   | 20.40  | 13.28 | Yes | ** | 13.90 to 26.90   |
| OVX vs AO     | -56.70 | 36.93 | Yes | ** | -63.20 to -50.21 |
| OVX vs ACE I  | -45.29 | 29.49 | Yes | ** | -51.79 to -38.79 |
| OVX vs PTH    | -82.13 | 53.48 | Yes | ** | -88.62 to -75.63 |
| AO vs ACE I   | 11.41  | 7.433 | Yes | ** | 4.915 to 17.91   |
| AO vs PTH     | -25.42 | 16.56 | Yes | ** | -31.92 to -18.92 |
| ACE I vs PTH  | -36.84 | 23.99 | Yes | ** | -43.33 to -30.34 |

**Fig3-II (f)**

| Tukey's Multiple Comparison Test | Mean Diff. | q     | Significant? P < 0.05? | Summary | 95% CI of diff      |
|----------------------------------|------------|-------|------------------------|---------|---------------------|
| Sham vs OVX                      | -0.3259    | 29.59 | Yes                    | **      | -0.3725 to -0.2793  |
| Sham vs AO                       | -0.1471    | 13.35 | Yes                    | **      | -0.1937 to -0.1005  |
| Sham vs ACE I                    | -0.2465    | 22.38 | Yes                    | **      | -0.2931 to -0.1999  |
| Sham vs PTH                      | -0.06955   | 6.314 | Yes                    | **      | -0.1162 to -0.02293 |
| OVX vs AO                        | 0.1788     | 16.23 | Yes                    | **      | 0.1322 to 0.2254    |
| OVX vs ACE I                     | 0.07938    | 7.207 | Yes                    | **      | 0.03277 to 0.1260   |
| OVX vs PTH                       | 0.2563     | 23.27 | Yes                    | **      | 0.2097 to 0.3030    |
| AO vs ACE I                      | -0.09943   | 9.028 | Yes                    | **      | -0.1460 to -0.05282 |
| AO vs PTH                        | 0.07753    | 7.039 | Yes                    | **      | 0.03092 to 0.1241   |
| ACE I vs PTH                     | 0.1770     | 16.07 | Yes                    | **      | 0.1304 to 0.2236    |

**Fig 4(a)**

| Tukey's Multiple Comparison Test | Mean Diff. | q     | Significant? P < 0.05? | Summary | 95% CI of diff   |
|----------------------------------|------------|-------|------------------------|---------|------------------|
| Sham vs OVX                      | -41.20     | 102.6 | Yes                    | **      | -42.89 to -39.50 |
| Sham vs AO                       | -10.30     | 25.67 | Yes                    | **      | -12.00 to -8.604 |
| Sham vs ACE I                    | -16.84     | 41.94 | Yes                    | **      | -18.54 to -15.14 |
| Sham vs PTH                      | -13.57     | 33.79 | Yes                    | **      | -15.26 to -11.87 |
| OVX vs AO                        | 30.89      | 76.95 | Yes                    | **      | 29.19 to 32.59   |
| OVX vs ACE I                     | 24.36      | 60.68 | Yes                    | **      | 22.66 to 26.06   |
| OVX vs PTH                       | 27.63      | 68.83 | Yes                    | **      | 25.93 to 29.33   |
| AO vs ACE I                      | -6.533     | 16.27 | Yes                    | **      | -8.232 to -4.834 |
| AO vs PTH                        | -3.262     | 8.125 | Yes                    | **      | -4.961 to -1.563 |
| ACE I vs PTH                     | 3.272      | 8.150 | Yes                    | **      | 1.573 to 4.971   |

**Fig 4(b)**

| Tukey's Multiple Comparison Test | Mean Diff. | q     | Significant? P < 0.05? | Summary | 95% CI of diff   |
|----------------------------------|------------|-------|------------------------|---------|------------------|
| Sham vs OVX                      | -1122      | 38.01 | Yes                    | **      | -1266 to -978.0  |
| Sham vs AO                       | -599.6     | 20.31 | Yes                    | **      | -743.8 to -455.3 |
| Sham vs ACE I                    | -500.9     | 16.97 | Yes                    | **      | -645.1 to -356.6 |
| Sham vs PTH                      | -194.2     | 6.579 | Yes                    | *       | -338.5 to -49.97 |
| OVX vs AO                        | 522.7      | 17.70 | Yes                    | **      | 378.4 to 666.9   |
| OVX vs ACE I                     | 621.3      | 21.05 | Yes                    | **      | 477.1 to 765.6   |
| OVX vs PTH                       | 928.0      | 31.43 | Yes                    | **      | 783.7 to 1072    |
| AO vs ACE I                      | 98.67      | 3.342 | No                     | ns      | -45.58 to 242.9  |
| AO vs PTH                        | 405.3      | 13.73 | Yes                    | **      | 261.1 to 549.6   |
| ACE I vs PTH                     | 306.7      | 10.39 | Yes                    | **      | 162.4 to 450.9   |

**Fig 4(c)**

| Tukey's Multiple Comparison Test | Mean Diff. | q     | Significant? P < 0.05? | Summary | 95% CI of diff    |
|----------------------------------|------------|-------|------------------------|---------|-------------------|
| Sham vs OVX                      | -5.667     | 24.32 | Yes                    | **      | -6.805 to -4.528  |
| Sham vs AO                       | -2.067     | 8.871 | Yes                    | **      | -3.205 to -0.9283 |
| Sham vs ACE I                    | -3.433     | 14.74 | Yes                    | **      | -4.572 to -2.295  |
| Sham vs PTH                      | -1.033     | 4.435 | No                     | ns      | -2.172 to 0.1050  |
| OVX vs AO                        | 3.600      | 15.45 | Yes                    | **      | 2.462 to 4.738    |
| OVX vs ACE I                     | 2.233      | 9.586 | Yes                    | **      | 1.095 to 3.372    |
| OVX vs PTH                       | 4.633      | 19.89 | Yes                    | **      | 3.495 to 5.772    |
| AO vs ACE I                      | -1.367     | 5.866 | Yes                    | *       | -2.505 to -0.2283 |

|              |       |       |     |    |                  |
|--------------|-------|-------|-----|----|------------------|
| AO vs PTH    | 1.033 | 4.435 | No  | ns | -0.1050 to 2.172 |
| ACE I vs PTH | 2.400 | 10.30 | Yes | ** | 1.262 to 3.538   |

**Fig 5(a)**

| Tukey's Multiple Comparison Test | Mean Diff. | q     | Significant? P < 0.05? | Summary | 95% CI of diff   |
|----------------------------------|------------|-------|------------------------|---------|------------------|
| Sham vs OVX                      | -311.7     | 169.6 | Yes                    | **      | -320.6 to -302.7 |
| Sham vs AO                       | -233.3     | 126.9 | Yes                    | **      | -242.3 to -224.4 |
| Sham vs ACE I                    | -143.0     | 77.80 | Yes                    | **      | -152.0 to -134.0 |
| Sham vs PTH                      | -55.33     | 30.10 | Yes                    | **      | -64.31 to -46.35 |
| OVX vs AO                        | 78.33      | 42.62 | Yes                    | **      | 69.35 to 87.31   |
| OVX vs ACE I                     | 168.7      | 91.76 | Yes                    | **      | 159.7 to 177.6   |
| OVX vs PTH                       | 256.3      | 139.5 | Yes                    | **      | 247.4 to 265.3   |
| AO vs ACE I                      | 90.33      | 49.14 | Yes                    | **      | 81.35 to 99.31   |
| AO vs PTH                        | 178.0      | 96.84 | Yes                    | **      | 169.0 to 187.0   |
| ACE I vs PTH                     | 87.67      | 47.69 | Yes                    | **      | 78.69 to 96.65   |

**Fig 5(b)**

| Tukey's Multiple Comparison Test | Mean Diff. | q     | Significant? P < 0.05? | Summary | 95% CI of diff   |
|----------------------------------|------------|-------|------------------------|---------|------------------|
| Sham vs OVX                      | 81.81      | 95.73 | Yes                    | **      | 78.19 to 85.43   |
| Sham vs AO                       | 46.57      | 54.50 | Yes                    | **      | 42.95 to 50.19   |
| Sham vs ACE I                    | 64.10      | 75.00 | Yes                    | **      | 60.48 to 67.72   |
| Sham vs PTH                      | 30.51      | 35.70 | Yes                    | **      | 26.89 to 34.12   |
| OVX vs AO                        | -35.24     | 41.23 | Yes                    | **      | -38.85 to -31.62 |
| OVX vs ACE I                     | -17.71     | 20.72 | Yes                    | **      | -21.33 to -14.09 |
| OVX vs PTH                       | -51.30     | 60.03 | Yes                    | **      | -54.92 to -47.68 |
| AO vs ACE I                      | 17.53      | 20.51 | Yes                    | **      | 13.91 to 21.14   |
| AO vs PTH                        | -16.06     | 18.80 | Yes                    | **      | -19.68 to -12.45 |
| ACE I vs PTH                     | -33.59     | 39.31 | Yes                    | **      | -37.21 to -29.97 |

**Fig 5(c)**

| Tukey's Multiple Comparison Test | Mean Diff. | q     | Significant? P < 0.05? | Summary | 95% CI of diff   |
|----------------------------------|------------|-------|------------------------|---------|------------------|
| Sham vs OVX                      | 103.2      | 104.4 | Yes                    | **      | 99.06 to 107.3   |
| Sham vs AO                       | 26.42      | 26.72 | Yes                    | **      | 22.31 to 30.53   |
| Sham vs ACE I                    | 38.73      | 39.17 | Yes                    | **      | 34.62 to 42.83   |
| Sham vs PTH                      | 11.84      | 11.97 | Yes                    | **      | 7.727 to 15.94   |
| OVX vs AO                        | -76.75     | 77.63 | Yes                    | **      | -80.86 to -72.64 |
| OVX vs ACE I                     | -64.45     | 65.18 | Yes                    | **      | -68.55 to -60.34 |
| OVX vs PTH                       | -91.34     | 92.38 | Yes                    | **      | -95.44 to -87.23 |
| AO vs ACE I                      | 12.31      | 12.45 | Yes                    | **      | 8.200 to 16.42   |
| AO vs PTH                        | -14.58     | 14.75 | Yes                    | **      | -18.69 to -10.47 |
| ACE I vs PTH                     | -26.89     | 27.20 | Yes                    | **      | -31.00 to -22.78 |

**Fig 6(a)**

| Tukey's Multiple Comparison Test | Mean Diff. | q     | Significant? P < 0.05? | Summary | 95% CI of diff    |
|----------------------------------|------------|-------|------------------------|---------|-------------------|
| Sham vs OVX                      | 24.17      | 33.32 | Yes                    | **      | 21.10 to 27.24    |
| Sham vs AO                       | 11.40      | 15.72 | Yes                    | **      | 8.330 to 14.47    |
| Sham vs ACE I                    | 15.40      | 21.23 | Yes                    | **      | 12.33 to 18.47    |
| Sham vs PTH                      | 7.533      | 10.39 | Yes                    | **      | 4.463 to 10.60    |
| OVX vs AO                        | -12.77     | 17.60 | Yes                    | **      | -15.84 to -9.697  |
| OVX vs ACE I                     | -8.767     | 12.09 | Yes                    | **      | -11.84 to -5.697  |
| OVX vs PTH                       | -16.63     | 22.93 | Yes                    | **      | -19.70 to -13.56  |
| AO vs ACE I                      | 4.000      | 5.514 | Yes                    | **      | 0.9301 to 7.070   |
| AO vs PTH                        | -3.867     | 5.330 | Yes                    | **      | -6.937 to -0.7968 |
| ACE I vs PTH                     | -7.867     | 10.84 | Yes                    | **      | -10.94 to -4.797  |

**Fig 6(b)**

| Tukey's Multiple Comparison Test | Mean Diff. | q     | Significant? P < 0.05? | Summary | 95% CI of diff   |
|----------------------------------|------------|-------|------------------------|---------|------------------|
| Sham vs OVX                      | 56.96      | 58.87 | Yes                    | **      | 52.86 to 61.05   |
| Sham vs AO                       | 22.90      | 23.67 | Yes                    | **      | 18.81 to 26.99   |
| Sham vs ACE I                    | 37.98      | 39.25 | Yes                    | **      | 33.88 to 42.07   |
| Sham vs PTH                      | 9.818      | 10.15 | Yes                    | **      | 5.724 to 13.91   |
| OVX vs AO                        | -34.06     | 35.20 | Yes                    | **      | -38.15 to -29.96 |
| OVX vs ACE I                     | -18.98     | 19.62 | Yes                    | **      | -23.08 to -14.89 |
| OVX vs PTH                       | -47.14     | 48.72 | Yes                    | **      | -51.23 to -43.05 |
| AO vs ACE I                      | 15.08      | 15.58 | Yes                    | **      | 10.98 to 19.17   |
| AO vs PTH                        | -13.08     | 13.52 | Yes                    | **      | -17.18 to -8.987 |
| ACE I vs PTH                     | -28.16     | 29.10 | Yes                    | **      | -32.25 to -24.06 |
